1 Efficient production of Moloney murine leukemia virus-like particles pseudotyped  
2 with the severe acute respiratory syndrome coronavirus-2 (SARS-CoV-2) spike protein

3

4 Sylvie Roy,<sup>a</sup> Karim Ghani,<sup>a,b</sup> Pedro O. de Campos-Lima,<sup>c,d</sup> Manuel Caruso<sup>a,b,e,#</sup>

5 <sup>a</sup>CHU de Québec-Université Laval Research Center (Oncology division), Université Laval Cancer

6 Research Center, Québec, Qc, Canada.

7 <sup>b</sup>BioVec Pharma, Québec, Qc Canada

8 <sup>c</sup>Boldrini Children's Center, Campinas, Brazil

9 <sup>d</sup>Functional and Molecular Biology Graduate Program, State University of Campinas, Brazil

10 <sup>e</sup>Department of Molecular Biology, Medical Biochemistry and Pathology, Faculty of Medicine,

11 Université Laval, Québec, Qc, Canada

12

13 Running Head: Pseudotyping of MLV with the SARS-CoV-2 S protein

14 <sup>#</sup>Address correspondence to Manuel Caruso, [manuel.caruso@crchudequebec.ulaval.ca](mailto:manuel.caruso@crchudequebec.ulaval.ca).

15 Word count for the abstract: 250

16 Word count for the text: 4237

17 **ABSTRACT** The severe acute respiratory syndrome coronavirus 2 (SARS-CoV-2) outbreak that  
18 started in China at the end of 2019 has rapidly spread to become pandemic. Several investigational  
19 vaccines that have already been tested in animals and humans were able to induce neutralizing  
20 antibodies against the SARS-CoV-2 spike (S) protein, however protection and long-term efficacy in  
21 humans remain to be demonstrated.

22 We have investigated if a virus-like particle (VLP) derived from Moloney murine leukemia virus  
23 (MLV) could be engineered to become a candidate SARS-CoV-2 vaccine amenable to mass  
24 production. First, we showed that a codon optimized version of the S protein could migrate  
25 efficiently to the cell membrane. However, efficient production of infectious viral particles was only  
26 achieved with stable expression of a shorter version of S in its C-terminal domain ( $\Delta$ S) in 293 cells  
27 that express MLV Gag-Pol (293GP). The incorporation of  $\Delta$ S was 15-times more efficient into VLPs  
28 as compared to the full-length version, and that was not due to steric interference between the S  
29 cytoplasmic tail and the MLV capsid. Indeed, a similar result was also observed with extracellular  
30 vesicles released from parental 293 and 293GP cells. The amount of  $\Delta$ S incorporated into VLPs  
31 released from producer cells was robust, with an estimated 1.25  $\mu$ g/ml S2 equivalent (S is comprised  
32 of S1 and S2). Thus, a scalable platform that has the potential for production of pan-coronavirus VLP  
33 vaccines has been established. The resulting nanoparticles could potentially be used alone or as a  
34 boost for other immunization strategies for COVID-19.

35           **IMPORTANCE** Several candidate COVID-19 vaccines have already been tested in humans,  
36 but their protective effect and long-term efficacy are uncertain. Therefore, it is necessary to continue  
37 developing new vaccine strategies that could be more potent and/or that would be easier to  
38 manufacture in large-scale. Virus-like particle (VLP) vaccines are considered highly immunogenic  
39 and have been successfully developed for human papilloma virus as well as hepatitis and influenza  
40 viruses. In this study, we report the generation of a robust Moloney murine leukemia virus platform  
41 that produces VLPs containing the spike of SARS-CoV-2. This vaccine platform that is compatible  
42 with lyophilization could simplify storage and distribution logistics immensely.

43 A cluster of severe pneumonia cases emerged in Wuhan in the Chinese province of Hubei in  
44 December 2019 and has quickly become a worldwide pandemic. A new virus was later identified as  
45 the etiological agent: the severe acute respiratory syndrome coronavirus 2 (SARS-CoV-2), and the  
46 condition was named coronavirus disease 2019 (COVID-19) by the World Health Organization (1,  
47 2). As of today, September 16<sup>th</sup> 2020, 29 million people have been infected, and 939,000 deaths have  
48 been recorded (gisaid.org), but these numbers are probably well underestimated. In addition to its  
49 severe health threat, COVID-19 has profound socioeconomic consequences (3).

50 SARS-CoV-2 is the seventh coronavirus that has been identified so far. HCoV-NL63, HCoV-  
51 229E, HCoV-OC43 and HKU1 strains are constantly present in the human population and cause mild  
52 common-cold symptoms (4). The other two, SARS-CoV and the Middle East respiratory syndrome  
53 (MERS)-CoV, are similar to SARS-CoV2 in that they are highly pathogenic to humans causing acute  
54 respiratory disease (5). Two epidemics were caused by SARS-CoV and MERS-CoV, respectively:  
55 SARS that originated in China in 2002 and MERS which emerged 10 years later in the Middle East.  
56 These two viruses did not spread widely as only 8,096 cases were reported for SARS-CoV and 2,494  
57 for MERS but had an exceedingly high mortality rate (9-35%). There have been no new cases of  
58 SARS-CoV reported since 2004 although MERS is still endemic in the Middle East (6). The three  
59 highly pathogenic coronaviruses are zoonotic and have emerged from bats with dromedary camels,  
60 palm civet and most likely pangolin being the intermediary host for MERS-CoV, SARS-CoV and  
61 SARS-CoV-2, respectively (4, 7-13). Coronaviruses are single-stranded positive-sense RNA viruses  
62 that are composed of four structural proteins: spike (S), nucleocapsid, envelope and membrane (4).  
63 The S protein that is about 180 kDa assembles as a trimer at the virus surface. It is composed of two  
64 subunits S1 and S2 that are responsible for the virus attachment and fusion. MERS uses dipeptidyl

65 peptidase 4 as its receptor, while SARS-CoV and SARS-CoV-2 share the same receptor for entering  
66 cells: the angiotensin-converting enzyme 2 (ACE2) (13-19).

67 Efforts are being made to identify candidate neutralizing antibodies (Nabs) that could block the  
68 interaction of SARS-CoV2-S with its receptor and that could be used for treating infected patients  
69 (20-22). Several vaccine strategies for COVID-19 are also intensively pursued, with S protein being  
70 the major target (23-25). These vaccines are produced from different platforms: RNA, DNA,  
71 recombinant proteins, viral vector-based or virus-like particles (VLPs), and live attenuated and  
72 inactivated viruses (23-25).

73 Vaccines made from RNA, DNA or proteins are usually easier to manufacture than those that  
74 are virus-derived but it is generally accepted that vaccines made of the original virus (attenuated) or  
75 from VLPs induce a better immune response (26). This is an important point to consider as a  
76 COVID-19 vaccine ideally should induce high-titer Nabs for a long-lasting period of time.

77 Preliminary results obtained in animals and in humans have shown that both humoral and  
78 cellular immune responses can be obtained with different vaccine strategies, and that Nab titers  
79 achieved by vaccination in humans were comparable to those measured in the serum of COVID-19  
80 convalescent individuals (25, 27-38). A recent study evaluating a DNA vaccine indicated that  
81 macaques were protected upon SARS-CoV-2 challenges 13 weeks after vaccination (39). However,  
82 only long-term studies in humans will tell us about the efficacy of all these vaccines.

83 VLPs are produced by the assembly of viral proteins that do not contain genetic material, and  
84 that are then unable to replicate. VLPs are advantageous for their immunostimulatory activity: they  
85 are highly recognized by antigen-presenting cells and the repetitive arrangement of antigens on their  
86 surface is capable of inducing both innate and adaptive immune responses with a high level of Nabs

87 (26). VLPs have already been successfully developed for Human Papilloma Virus, Hepatitis B, E,  
88 and A Virus and influenza virus (26).

89 The difficulty of developing COVID-19 vaccines in a short period of time is compounded by  
90 the major hurdle of creating mass production capacity to deliver the final product for the entire world  
91 population. In this study, we have engineered and characterized a Moloney murine leukemia virus  
92 (MLV) VLP platform that has the potential for large-scale production of a COVID-19 vaccine.

## 93 **RESULTS**

94 **The SARS CoV-2 S protein migrates to the cell surface.** The production of an MLV-derived  
95 VLP COVID-19 vaccine requires the presence of the carried immunogenic molecule (in our case the  
96 S protein) at the surface of the producer cell. As coronaviruses assemble at the ER-Golgi  
97 intermediate compartment (4), we had first to verify if the S protein could migrate efficiently to the  
98 cell surface. A full-length, codon-optimized S gene as well as a shorter version in which the last 3' 57  
99 nucleotides are lacking were cloned into an expression vector. The rationale for the construction of  
100 the latter is based on the presence of an endoplasmic reticulum retention signal in the cytoplasmic tail  
101 of the coronaviruses S protein and previous reports that a 19-amino acid C-terminal deletion of  
102 SARS-CoV S increases the production of MLV or vesicular stomatitis (VSV) infectious particles  
103 (40-46). After transfection in 293 cells, both S versions were detected with a very similar intensity at  
104 the cell surface (Fig. 1). These results indicated that S was able to efficiently migrate to the cell  
105 membrane and that, in these experimental conditions, the endoplasmic reticulum retention signal did  
106 not affect its localization.

107 **Inefficient transient production of infectious recombinant MLV viruses pseudotyped with**  
108 **the SARS CoV-2 S protein.** The production of VLPs pseudotyped with S or  $\Delta$ S (VLP-S) was next  
109 assessed by generating GFP recombinant viruses in transient transfections. Titers were measured by

110 FACS analysis on 293-ACE2 cells, a cell line generated by stable transfection that is 61% positive  
111 for ACE2 (Fig. 2). Titers of  $3.2 \times 10^7$  infectious units (IU)/ml and  $1.5 \times 10^6$  IU/ml were obtained for  
112 VSV-G- and Galv-pseudotyped viruses, although titers of S and  $\Delta$ S-pseudotyped viruses were below  
113 the detection limit of  $10^4$  IU/ml (Fig. 3A). Only few GFP cells could be observed by fluorescence  
114 microscopy after infection with the  $\Delta$ S-pseudotyped virus and there were none when the S-  
115 pseudotyped vector was used (Fig. 3B). Thus, these results indicated that the transient production was  
116 extremely inefficient for generating VLP-S, even with  $\Delta$ S.

117  **$\Delta$ S-pseudotyped MLV recombinant viral particles are efficiently released from stable**  
118 **producer cells.** We have shown that stable retrovirus packaging cell lines can generate Galv-  
119 pseudotyped vectors with at least 10-fold higher titers as compared to transient transfection  
120 productions (47). We then hypothesized that S or  $\Delta$ S stably expressed in 293GP cells (293 cells that  
121 express MLV Gag-Pol) could be a better system to produce VLP-S. Stable populations of 293GP  
122 cells expressing S and  $\Delta$ S were then generated by transfection. In these cells, S and  $\Delta$ S were able to  
123 localize at the cell surface at even higher levels than what we found in transient transfection (Fig.  
124 4A). A GFP retroviral vector was then introduced in these cells by infection (Fig 4B), and titers of  
125 GFP viruses released by these new producers were measured after infecting 293-ACE2 cells. Only  
126 few GFP positive cells could be detected by fluorescence microscopy after infection of 293-ACE2  
127 cells with the S-pseudotyped vector, but a very high percentage of fluorescent cells was observed  
128 after infection with the  $\Delta$ S virus. A high number of GFP positive cells was seen with the Galv virus  
129 diluted 10-times as compared to the two other vectors (Fig. 5A). Titers of  $1.6 \times 10^7$  IU/ml and  $10^5$   
130 IU/ml were measured for the Galv and  $\Delta$ S-pseudotyped viruses, respectively, and the S-pseudotyped  
131 vector titer was below the detection limit of  $10^4$  IU/ml, as expected (Fig 5B). We could conclude that

132 the production of recombinant viral particles was robust from stable producers expressing  $\Delta S$  and  
133 inefficient with the full-length version of SARS CoV-2 S.

134 **The deletion of the 19 amino acid cytoplasmic tail of S does not enhance its fusogenicity.**

135 As producer cells express the same amount of S and  $\Delta S$  at the cell surface, one possible explanation  
136 for the high transduction efficiency of  $\Delta S$ -pseudotyped vectors could be increased fusogenicity. The  
137 fusion capacity of S and  $\Delta S$  was then assessed in a syncytia formation assay by mixing 293GP cells  
138 expressing S or  $\Delta S$  with 293-ACE2 cells. The number and the size of syncytia evaluated one day  
139 after mixing were very similar between S and  $\Delta S$  mixtures, and there were none with the control 293  
140 cells (Fig. 6). Thus, the deletion of the 19 amino acids in the S cytoplasmic tail does not have a  
141 significant effect on its fusogenicity.

142 **High amounts of SARS-CoV-2  $\Delta S$  protein are incorporated into MLV VLPs released**

143 **from stable producer cells.** A VLP-derived SARS CoV-2 vaccine will be a viable option if  
144 sufficient amounts of S protein are incorporated at the surface of the released particles. Western blots  
145 were performed with an anti-S2 antibody to evaluate the quantity of S protein into VLPs produced in  
146 transient transfections and from stable producers. Two bands were detected around 90 kDa that are  
147 most likely two glycosylated forms of S2. The uncleaved S protein migrated around 180 kDa, and  
148 two other bands above 250 kDa were also detected in the  $\Delta S$  samples that had more intense signals.  
149 These bands could be dimeric and trimeric forms of S as it has been suggested (19). The amount of  
150 S2 detected at the surface of VLPs produced in transient transfections or released from stable  
151 producers was much higher with the truncated version of S than with the full-length molecule (Fig.  
152 7A). MLV viral particles produced in transient transfection or from stable producers were detected  
153 with an antibody against p30. A 4- and a 15-fold difference was found with the transient and the  
154 stable production systems, respectively (Fig. 7B), although there was less than a 1.5-fold difference



155 between S and  $\Delta$ S in cellular extracts (Fig. 7C). More  $\Delta$ S was also released as compared to the full-  
156 length protein in the supernatants of stably transfected 293 cells, however the amount of  $\Delta$ S detected  
157 was 4-to-5 times lower than the one released from the 293GP- $\Delta$ S. The amount of S2 equivalent  
158 present in the supernatant of 293GP- $\Delta$ S cells was high and evaluated at 1.25  $\mu$ g/ml using the IgG-S2  
159 standard (Fig. 7A). Our results indicated that the incorporation of S into MLV VLPs is very efficient  
160 in stable producers but only with the truncated version of S.

161 **SARS-CoV2  $\Delta$ S protein is preferentially incorporated into MLV VLPs versus**  
162 **extracellular vesicles.** As stable transfected 293 cells were capable of releasing S or  $\Delta$ S, we decided  
163 to further characterize the supernatants of the 293GP- $\Delta$ S. We used an iodixanol velocity gradient to  
164 discriminate VLPs from extracellular vesicles (EVs) as this technique has been used in the past to  
165 successfully separate human immunodeficiency viruses (HIV) from EVs (48, 49). Western blots with  
166 anti-S2 and anti-p30 antibodies were performed on the collected gradient fractions of 293- $\Delta$ S and  
167 293GP- $\Delta$ S supernatants. S2 was detected in the top fractions from the 293- $\Delta$ S supernatant but there  
168 were none in the last 3 bottom fractions (Fig. 8A). A similar detection pattern was observed in the top  
169 fractions of the supernatant from 293GP- $\Delta$ S, but the majority of S2 came from the 2 bottom fractions  
170 in which a band corresponding to the uncleaved S protein was also detected. The p30 signal was  
171 present in these two fractions, which indicated that the majority of  $\Delta$ S released from 293GP- $\Delta$ S cells  
172 was incorporated into VLPs (Fig. 8B).

173

## 174 **DISCUSSION**

175 Immunization will be the best preventive strategy to address the current COVID-19 pandemic,  
176 although therapeutic alternatives cannot be neglected as an efficient vaccine is not a certainty (23, 25,  
177 50). Yet preliminary results from preclinical and clinical studies are encouraging as several types of

178 vaccines are able to trigger the production of Nabs against SARS-CoV-2 S (25, 27-31, 33-39, 51, 52).  
179 How efficient and how long these Nabs will be present in vaccinated people remains an open  
180 question that will only be answered with time (25). Also, antibody-dependent enhancement will have  
181 to be carefully monitored in these trials as it is a side effect that cannot be underestimated with  
182 coronaviruses (23, 25, 50). One other major challenge ahead will be the capacity to mass produce  
183 COVID-19 vaccines. In this study, we have established and characterized a new MLV-derived VLP  
184 platform that could be used for the production of a COVID-19 vaccine.

185         The efficient pseudotyping of MLV particles with S is a prerequisite to establish a robust VLP  
186 platform. Studies on SARS-CoV and more recently on SARSCoV-2 have shown that the codon  
187 optimization of S and the deletion of the ER retention signal located in the cytoplasmic tail are  
188 modifications that increase the pseudotyping of MLV, HIV, simian immunodeficiency and VSV viral  
189 vectors (40, 46, 53-55). The codon optimization enhances the level of S expression, but the role of  
190 the ER retention signal is less clear. Indeed, it was recently reported that the localization of SARS-  
191 CoV-2 S at the cell surface was not improved after disrupting the ER retention signal by missense  
192 mutations (56). In this study, we showed that S could be detected at the cell surface at a similar level  
193 to that achieved by  $\Delta$ S in transiently transfected cells as well as in stable producers (Fig. 1 and Fig.  
194 4A), a finding that has also been reported for SARS-CoV S expressed in transient transfections (40,  
195 54). These results indicate that S can bypass its natural localization and efficiently migrates to the cell  
196 surface when it is overexpressed.

197         Despite similar amounts of S and  $\Delta$ S at the cellular membrane, the truncated version was more  
198 efficiently incorporated into MLV viral particles. Four- and 15-fold differences were obtained with  
199 VLPs produced in transient transfection experiments and from stable producers, respectively (Fig.  
200 7B). The hypothesis that has been proposed for SARS-COV and SARS-CoV-2 is that the 19 amino-

201 acid deletion in the S cytoplasmic tail facilitates the pseudotyping by decreasing the steric  
202 interference with the retroviral matrix proteins (54, 55, 57). Our results invalidate this hypothesis as  
203 more  $\Delta$ S was also found in the supernatant of 293 transfected cells that did not express MLV Gag-Pol  
204 (Fig. 7A). Parental 293 and 293GP cells release EVs that can incorporate  $\Delta$ S more efficiently than S  
205 (Fig. 7A and Fig. 8). VLPs and EVs are very similar in composition, and it has been postulated that  
206 they use similar pathways for vesicle trafficking (58, 59). So, unlike S,  $\Delta$ S was efficiently  
207 incorporated into VLPs or EVs like for example tetraspanins or endosomal markers that are equally  
208 found in both particle types (58, 59).

209 EVs released from 293GP- $\Delta$ S contain less than 10% of the total  $\Delta$ S protein, and they would not  
210 need to be removed from vaccine preparations as they could be as good immunogens as VLPs. It was  
211 even reported that EVs containing the S protein of SARS-CoV could induce high levels of Nabs (60).

212 Titers of recombinant GFP retroviruses released from stable producers were at least a 1000-fold  
213 higher with  $\Delta$ S versus S despite a 15-fold difference in the amount of the two proteins incorporated at  
214 the surface of VLPs (Fig. 5A and Fig 7B). As we did not find major differences in fusogenicity  
215 between S and  $\Delta$ S in a syncytia formation assay (Fig. 6), our results suggest that recombinant viruses  
216 become fully infectious when a certain threshold of S protein is incorporated at their surface.

217 Recombinant GFP or luciferase pseudotyped retroviruses are commonly used to measure the  
218 activity of Nabs present in serum of infected or vaccinated people (55-57). These reagents are  
219 convenient, as unlike SARS-CoV-2 they can be manipulated in a BSL-2 laboratory. The robust  
220 production system with the 293GP- $\Delta$ S cell line could be highly valuable to evaluate the presence of  
221 Nabs in large cohorts.

222 Mass production will be a major challenge with all types of SARS-CoV-2 vaccine that are  
223 being developed as the entire worldwide population will have to be vaccinated. Based on the results

224 of a nanoparticle vaccine containing S, whose 5 and 25  $\mu\text{g}$  doses triggered a high level of Nabs in  
225 people (28), we assume that a vaccine derived from the VLP platform described in this study could  
226 be efficient with similar or lower amounts of S per dose. The yield of VLPs produced from the  
227 293GP- $\Delta\text{S}$  cells could be increased if a high producer clone is selected instead of a bulk population,  
228 and if cells are cultured in bioreactors in fed-batch or perfusion modes. The average titer of gene  
229 therapy vectors produced with a derivative of the 293GP cell line was increased by 5.6-fold in  
230 bioreactor versus a 10-layer cell factory, and the total vector yield was increased by 13.1-fold (61).  
231 Mutations of the furin cleavage site located between S1 and S2 and the D614G variant that is now  
232 more prevalent in the infected population could increase the amount of S incorporated into VLPs (57,  
233 62).

234 A very concise review that compared the first results of different COVID-19 vaccines  
235 concluded that the most immunogenic ones were made with recombinant proteins (25). These results  
236 emphasize the importance of the platform developed in this study because VLPs present the antigen  
237 in a protein format that seems more potent for vaccination than the protein alone. Indeed, MLV VLPs  
238 displaying the human cytomegalovirus glycoprotein B antigen could trigger 10-times more Nabs in  
239 mice than the protein alone using the same amount of antigen (63). Finally, VLP-S could be used as a  
240 boost for other types of vaccine like measles virus- and adenovirus-based recombinant vectors. These  
241 combinations were highly potent for triggering Nabs against hepatitis C proteins in mice and  
242 macaques (64).

243 In conclusion, we have developed and characterized a new MLV VLP platform that can  
244 efficiently incorporate the S protein from SARS-CoV-2, and that has the potential to produce a pan-  
245 coronavirus vaccine. The next logical step is to validate this vaccine in experimental animals and in  
246 humans thereafter.

## 247 MATERIALS AND METHODS

248 **Plasmids.** The expression plasmid pMD2ACE2iPuro<sup>r</sup> containing the human angiotensin-  
249 converting enzyme (ACE2) cDNA used to generate ACE2 positive cells was constructed as follows:  
250 the ACE2 *PmeI* cDNA fragment obtained from the plasmid hACE2 (Addgene; #1786) was cloned in  
251 pMD2iPuro<sup>r</sup> opened in *EcoRV*.

252 The SARS-CoV-2 *S* gene from the Wuhan-Hu-1 isolate (GenBank: MN908947.3) was codon  
253 optimized (Genscript, Township, NJ) and cloned in pMD2iPuro<sup>r</sup> in *EcoRI/XhoI*. A shorter version with  
254 a 19-codon deletion in C-terminal ( $\Delta S$ ) was also constructed in a similar way.

255 The pMD2.GalviPuro<sup>r</sup> and pMD2.G plasmids that encode the Galv and VSV-G envelopes, and  
256 the retroviral vector plasmid containing the *GFP* gene under the control of the 5' long terminal repeat  
257 sequence have been described elsewhere (65).

258 **Cell Lines.** 293GP, 293 cells (ATCC, CRL-11268), and their derivatives expressing the ACE2  
259 receptor (293-ACE2), S (293GP-S and 293-S), DeltaS (293GP- $\Delta S$  and 293- $\Delta S$ ) and the Galv envelope  
260 (293GP-Galv) were cultured with Dulbecco's modified Eagle's medium (DMEM; Wisent, Canada)  
261 supplemented with 10% fetal calf serum (Life Technologies, Grand island, NY) and antibiotics  
262 (Wisent). Bulk populations of 293-ACE2, 293-S, 293- $\Delta S$ , 293GP-S, 293GP- $\Delta S$  and 293GP-Galv were  
263 established by transfection using the calcium phosphate procedure. Briefly, subconfluent 293 or 293GP  
264 cells plated in 10-cm dishes were transfected with 20  $\mu g$  of the pMD2 plasmids expressing ACE2, S,  
265  $\Delta S$  or Galv. Two days later, cells were selected in puromycin for a period of 10 days (0.5  $\mu g/ml$ ). Bulk  
266 populations of 293GP-S/GFP, 293GP- $\Delta S$ /GFP and 293GP-Galv/GFP were generated by infections of

267 the parental cells with a GFP vector pseudotyped with VSV-G produced in transient transfection. The  
268 3 derived cell lines were at least 86% GFP positive (Fig. 4B).

269 **Virus Productions and Infections.** The production of GFP recombinant retroviruses was  
270 generated by transient transfection of 293 cells. One day prior transfection,  $3 \times 10^6$  cells were plated in  
271 60-mm dishes. 293 cells were transfected for 4-hours by the calcium phosphate procedure with  $1 \mu\text{g}$   
272 of envelope expression plasmids (pMD2.G, pMD2.GalviPuro<sup>r</sup>, pMD2.SiPuro<sup>r</sup> or pMD2. $\Delta$ SiPuro<sup>r</sup>), 4  
273  $\mu\text{g}$  of Gag-Pol expression plasmid (pMD2GPiZeo<sup>r</sup>) and  $5 \mu\text{g}$  of RetroVec plasmid. Two days later, 2.5  
274 ml of viral supernatants were harvested and frozen at  $-80^\circ\text{C}$ . Recombinant viruses from stable 293GP-  
275 S/GFP, 293GP- $\Delta$ S/GFP and 293GP-Galv/GFP cells were also produced similarly in 60-mm dishes.

276 Transduction efficiency of GFP vectors was determined by scoring fluorescent-positive target  
277 cells. 293-ACE2 cells were inoculated at a density of  $2 \times 10^5$  cells per well in 24-well plates. The  
278 next day, the medium from each well was replaced with different volume of viral supernatants  
279 containing  $8 \mu\text{g/ml}$  polybrene. Two days later, cells were trypsinized and analyzed by flow  
280 cytometry. Vector titers were calculated using the following formula  $(N \times P) \times 2 / (V \times D)$ . N= Cell  
281 number on the day of infection; P= percentage of fluorescent-positive cells determined by flow  
282 cytometry; V is the viral volume applied; and D is the virus dilution factor. Titers were calculated  
283 when the percentage of fluorescent-positive cells was comprised between 2 to 20%. Alternatively,  
284 GFP positive cells were assessed under a fluorescent microscope. The  $3 \times 3$  mosaic images of GFP  
285 and transmitted light were acquired with a Nikon TI-E inverted microscope with a PlanApo VC 20x  
286 0.75 NA objective using a Hamamatsu Orca-ER CCD camera. Acquisition and stitching were  
287 performed with the Nikon NIS Elements 5.02 software program. The fluorescence intensity of  
288 infected cells displayed in figure 5A were scanned using the Fiji software to evaluate the difference  
289 in viral titers (66).

290           **Syncytia Formation Assay.** 293-ACE2 cells were mixed with 293, 293GP-S and 293GP- $\Delta$ S at  
291 a 9/1 ratio and plated at  $4 \times 10^5$  cells/well in a 24-well plate. Fusion activity was analyzed 24 h later  
292 by phase contrast under the same microscope used for measuring the transduction efficiency.

293           **Protein Analysis.** The presence of S at the surface of 293 cells was assessed in transient  
294 transfections. Subconfluent cells in 6-well plates were transfected for 4 hours with 5  $\mu$ g of S or  $\Delta$ S  
295 plasmids by the calcium phosphate procedure, and 24 hours later, the media was replaced with serum-  
296 free media (SFM) BalanCD HEK293 (Fujifilm Irvine Scientific, Santa Ana, CA). The next day, cells  
297 were detached without trypsin by gently pipetting up and down the medium on top of the cells. A  
298 human chimeric anti-S1 antibody (Genscript; 1:200 dilution) followed by an Alexa647-conjugated goat  
299 anti-human IgG (Jackson Laboratories; 1:400) were successively incubated with cells for labelling.  
300 The fixable viability stain 450 (BD Biosciences, San Jose, CA, USA) was used to exclude dead cells.  
301 The presence of S was then analyzed by flow cytometry with a BD FACSAria II (BD Biosciences).  
302 Cells transfected with a Galv expression plasmid were used as control. The presence of stably  
303 expressed S at the cell surface of 293GP-S and 293GP- $\Delta$ S was similarly analyzed by flow cytometry.

304           The presence of ACE2 at the surface of 293-ACE2 cells was also checked by FACS. Detached  
305 cells were labelled with a mouse anti-ACE2 antibody (R&D Systems, Minneapolis, MN1/200)  
306 followed by an Alexa488 goat anti-mouse (1:1,000; Invitrogen, Carlsbad, CA).

307           The presence of S released in the supernatant of transiently transfected 293GP cells was  
308 analyzed by Western blot. Subconfluent cells plated in 60 mm were transfected for 4 h with 5  $\mu$ g of  
309 envelope expression plasmids and 5  $\mu$ g of the GFP retroviral plasmid. One day later, the media was  
310 replaced with 2.5 ml of SFM that was then harvested the following day. Supernatants were  
311 concentrated 10-fold with a 30 kDa Amicon centrifugal unit (Millipore Sigma, Oakville, Canada) and

312 were stored at -80°C until use. The GFP fluorescence evaluated under a microscope at the time of  
313 harvest was very similar among the different transfected plates.

314 Supernatants from confluent 293GP-S, 293GP-ΔS, 293-S and 293-ΔS cells were also harvested  
315 and concentrated from 60-mm dishes.

316 Cell pellets of  $1 \times 10^6$  cells were resuspended in 100  $\mu$ l RIPA lysis buffer containing a protease  
317 inhibitor cocktail (Roche). Samples were centrifuged for 5 min to remove cell debris and stored at -  
318 20°C until use for Western blot analysis.

319 Samples of 20  $\mu$ l were incubated 5 min at 95°C in loading buffer containing 1% SDS and 2.5%  
320  $\beta$ -mercaptoethanol, and run on a 10% SDS-polyacrylamide gel (4% stacking), followed by transfer  
321 onto nitrocellulose membranes (GE Healthcare). Immunoblotting was performed with a rabbit  
322 polyclonal antibody anti-S2 (1:400 dilution, SinoBiological, Beijing, China) and a rat monoclonal  
323 antibody anti-MLV p30 produced from the hybridoma R187 (1:2,000 dilution; American Type  
324 Culture Collection, Manassas, VA). Blots were then incubated with secondary antibodies  
325 IRDylight680 goat anti-rat IgG (1:10,000; Invitrogen) and IRDye 800CW anti-rabbit IgG (1:10,000;  
326 Li-Cor Biosciences, Lincoln, NE), and analyzed with the Odyssey Infrared Imaging System (Li-Cor  
327 Biosciences). Serial dilutions of known amounts of C-terminally Fc-tagged S2 (BioVendor, Brno,  
328 Czech Republic) were used for quantification.

329 **Velocity Gradient.** Thirty ml of supernatant from confluent 150-mm dishes of 293GP-ΔS and  
330 293-ΔS cells were harvested and filtered through a 0.45  $\mu$  membrane, and concentrated by  
331 ultracentrifugation for 90 min at 100,000 x g in a AH629 rotor. Pellets containing virions and EVs  
332 were resuspended in 1 ml PBS containing a protease cocktail inhibitor (Roche) during 2 h at 4°C. The  
333 resuspended vesicles were layered onto a 6-18% Optiprep™ 11-step discontinuous velocity gradient  
334 (Stemcell Technologies, Vancouver, Canada), and centrifuged for 90 min at 176,000 x g in a SW40Ti



335 rotor as previously described (48, 49). Fractions of approximately 800  $\mu$ l were collected from the  
336 bottom after puncturing the wall of the centrifuge tube with a gauge needle, and 20  $\mu$ l of each sample  
337 were analyzed by Western blot.

338

### 339 **ACKNOWLEDGMENTS**

340 The authors thank Carl Saint-Pierre for his technical assistance in microscopy.

341 This work was supported by BioVec Pharma. KG, POdeCL and MC are funders and shareholders  
342 of BioVec Pharma. MC is an author of a patent application covering the VLP platform presented in  
343 this study.

344

345

## 346 REFERENCES

- 347 1. Zhu N, Zhang D, Wang W, Li X, Yang B, Song J, Zhao X, Huang B, Shi W, Lu R, Niu P, Zhan F,  
348 Ma X, Wang D, Xu W, Wu G, Gao GF, Tan W, China Novel Coronavirus I, Research T. 2020. A  
349 Novel Coronavirus from Patients with Pneumonia in China, 2019. *N Engl J Med* 382:727-733.
- 350 2. Zhou P, Yang XL, Wang XG, Hu B, Zhang L, Zhang W, Si HR, Zhu Y, Li B, Huang CL, Chen HD,  
351 Chen J, Luo Y, Guo H, Jiang RD, Liu MQ, Chen Y, Shen XR, Wang X, Zheng XS, Zhao K, Chen QJ,  
352 Deng F, Liu LL, Yan B, Zhan FX, Wang YY, Xiao GF, Shi ZL. 2020. A pneumonia outbreak  
353 associated with a new coronavirus of probable bat origin. *Nature* 579:270-273.
- 354 3. Nicola M, Alsaifi Z, Sohrabi C, Kerwan A, Al-Jabir A, Iosifidis C, Agha M, Agha R. 2020. The  
355 socio-economic implications of the coronavirus pandemic (COVID-19): A review. *Int J Surg*  
356 78:185-193.
- 357 4. Fung TS, Liu DX. 2019. Human Coronavirus: Host-Pathogen Interaction. *Annu Rev Microbiol*  
358 73:529-557.
- 359 5. Cui J, Li F, Shi ZL. 2019. Origin and evolution of pathogenic coronaviruses. *Nat Rev Microbiol*  
360 17:181-192.
- 361 6. Docea AO, Tsatsakis A, Albulescu D, Cristea O, Zlatian O, Vinceti M, Moschos SA, Tsoukalas D,  
362 Goumenou M, Drakoulis N, Dumanov JM, Tutelyan VA, Onischenko GG, Aschner M,  
363 Spandidos DA, Calina D. 2020. A new threat from an old enemy: Reemergence of  
364 coronavirus (Review). *Int J Mol Med* 45:1631-1643.
- 365 7. Lau SKP, Luk HKH, Wong ACP, Li KSM, Zhu L, He Z, Fung J, Chan TTY, Fung KSC, Woo PCY.  
366 2020. Possible Bat Origin of Severe Acute Respiratory Syndrome Coronavirus 2. *Emerg Infect*  
367 *Dis* 26.
- 368 8. Lam TT, Shum MH, Zhu HC, Tong YG, Ni XB, Liao YS, Wei W, Cheung WY, Li WJ, Li LF, Leung  
369 GM, Holmes EC, Hu YL, Guan Y. 2020. Identifying SARS-CoV-2 related coronaviruses in  
370 Malayan pangolins. *Nature* doi:10.1038/s41586-020-2169-0.
- 371 9. Reusken CB, Raj VS, Koopmans MP, Haagmans BL. 2016. Cross host transmission in the  
372 emergence of MERS coronavirus. *Curr Opin Virol* 16:55-62.
- 373 10. Li W, Shi Z, Yu M, Ren W, Smith C, Epstein JH, Wang H, Crameri G, Hu Z, Zhang H, Zhang J,  
374 McEachern J, Field H, Daszak P, Eaton BT, Zhang S, Wang LF. 2005. Bats are natural  
375 reservoirs of SARS-like coronaviruses. *Science* 310:676-9.
- 376 11. Corman VM, Ithete NL, Richards LR, Schoeman MC, Preiser W, Drosten C, Drexler JF. 2014.  
377 Rooting the phylogenetic tree of middle East respiratory syndrome coronavirus by  
378 characterization of a conspecific virus from an African bat. *J Virol* 88:11297-303.
- 379 12. Lau SK, Woo PC, Li KS, Huang Y, Tsoi HW, Wong BH, Wong SS, Leung SY, Chan KH, Yuen KY.  
380 2005. Severe acute respiratory syndrome coronavirus-like virus in Chinese horseshoe bats.  
381 *Proc Natl Acad Sci U S A* 102:14040-5.
- 382 13. Raj VS, Mou H, Smits SL, Dekkers DH, Muller MA, Dijkman R, Muth D, Demmers JA, Zaki A,  
383 Fouchier RA, Thiel V, Drosten C, Rottier PJ, Osterhaus AD, Bosch BJ, Haagmans BL. 2013.  
384 Dipeptidyl peptidase 4 is a functional receptor for the emerging human coronavirus-EMC.  
385 *Nature* 495:251-4.
- 386 14. Letko M, Marzi A, Munster V. 2020. Functional assessment of cell entry and receptor usage  
387 for SARS-CoV-2 and other lineage B betacoronaviruses. *Nat Microbiol* 5:562-569.

- 388 15. Zhang T, Wu Q, Zhang Z. 2020. Probable Pangolin Origin of SARS-CoV-2 Associated with the  
389 COVID-19 Outbreak. *Curr Biol* 30:1346-1351 e2.
- 390 16. Hoffmann M, Kleine-Weber H, Schroeder S, Kruger N, Herrler T, Erichsen S, Schiergens TS,  
391 Herrler G, Wu NH, Nitsche A, Muller MA, Drosten C, Pohlmann S. 2020. SARS-CoV-2 Cell  
392 Entry Depends on ACE2 and TMPRSS2 and Is Blocked by a Clinically Proven Protease  
393 Inhibitor. *Cell* doi:10.1016/j.cell.2020.02.052.
- 394 17. Li W, Moore MJ, Vasilieva N, Sui J, Wong SK, Berne MA, Somasundaran M, Sullivan JL,  
395 Luzuriaga K, Greenough TC, Choe H, Farzan M. 2003. Angiotensin-converting enzyme 2 is a  
396 functional receptor for the SARS coronavirus. *Nature* 426:450-4.
- 397 18. Walls AC, Park YJ, Tortorici MA, Wall A, McGuire AT, Velesler D. 2020. Structure, Function,  
398 and Antigenicity of the SARS-CoV-2 Spike Glycoprotein. *Cell* doi:10.1016/j.cell.2020.02.058.
- 399 19. Ou X, Liu Y, Lei X, Li P, Mi D, Ren L, Guo L, Guo R, Chen T, Hu J, Xiang Z, Mu Z, Chen X, Chen J,  
400 Hu K, Jin Q, Wang J, Qian Z. 2020. Characterization of spike glycoprotein of SARS-CoV-2 on  
401 virus entry and its immune cross-reactivity with SARS-CoV. *Nat Commun* 11:1620.
- 402 20. Wrapp D, De Vlieger D, Corbett KS, Torres GM, Wang N, Van Breedam W, Roose K, van Schie  
403 L, Team V-CC-R, Hoffmann M, Pohlmann S, Graham BS, Callewaert N, Schepens B, Saelens X,  
404 McLellan JS. 2020. Structural Basis for Potent Neutralization of Betacoronaviruses by Single-  
405 Domain Camelid Antibodies. *Cell* doi:10.1016/j.cell.2020.04.031.
- 406 21. Marovich M, Mascola JR, Cohen MS. 2020. Monoclonal Antibodies for Prevention and  
407 Treatment of COVID-19. *JAMA* 324:131-132.
- 408 22. Renn A, Fu Y, Hu X, Hall MD, Simeonov A. 2020. Fruitful Neutralizing Antibody Pipeline Brings  
409 Hope To Defeat SARS-Cov-2. *Trends Pharmacol Sci* doi:10.1016/j.tips.2020.07.004.
- 410 23. Amanat F, Krammer F. 2020. SARS-CoV-2 Vaccines: Status Report. *Immunity* 52:583-589.
- 411 24. Moreno-Fierros L, Garcia-Silva I, Rosales-Mendoza S. 2020. Development of SARS-CoV-2  
412 vaccines: should we focus on mucosal immunity? *Expert Opin Biol Ther*  
413 doi:10.1080/14712598.2020.1767062.
- 414 25. Moore JP, Klasse PJ. 2020. SARS-CoV-2 vaccines: 'Warp Speed' needs mind melds not  
415 warped minds. *J Virol* doi:10.1128/JVI.01083-20.
- 416 26. Mohsen MO, Zha L, Cabral-Miranda G, Bachmann MF. 2017. Major findings and recent  
417 advances in virus-like particle (VLP)-based vaccines. *Semin Immunol* 34:123-132.
- 418 27. Zhu FC, Li YH, Guan XH, Hou LH, Wang WJ, Li JX, Wu SP, Wang BS, Wang Z, Wang L, Jia SY,  
419 Jiang HD, Wang L, Jiang T, Hu Y, Gou JB, Xu SB, Xu JJ, Wang XW, Wang W, Chen W. 2020.  
420 Safety, tolerability, and immunogenicity of a recombinant adenovirus type-5 vectored  
421 COVID-19 vaccine: a dose-escalation, open-label, non-randomised, first-in-human trial.  
422 *Lancet* 395:1845-1854.
- 423 28. Keech C, Albert G, Reed P, Neal S, Plested JS, Zhu M, Cloney-Clark S, Zhou H, Patel N,  
424 Frieman MB, Haupt RE, Logue J, McGrath M, Weston S, Piedra PA, Cho I, Robertson A, Desai  
425 C, Callahan K, Lewis M, Price-Abbott P, Formica N, Shinde V, Fries L, Linkliter JD, Griffin P,  
426 Wilkinson B, Smith G, Glenn GM. 2020. First-in-Human Trial of a SARS CoV 2 Recombinant  
427 Spike Protein Nanoparticle Vaccine. *medRxiv*  
428 doi:10.1101/2020.08.05.20168435:2020.08.05.20168435.
- 429 29. Jackson LA, Anderson EJ, Roupheal NG, Roberts PC, Makhene M, Coler RN, McCullough MP,  
430 Chappell JD, Denison MR, Stevens LJ, Pruijssers AJ, McDermott A, Flach B, Doria-Rose NA,  
431 Corbett KS, Morabito KM, O'Dell S, Schmidt SD, Swanson PA, 2nd, Padilla M, Mascola JR,

- 432 Neuzil KM, Bennett H, Sun W, Peters E, Makowski M, Albert J, Cross K, Buchanan W, Pikaart-  
433 Tautges R, Ledgerwood JE, Graham BS, Beigel JH, m RNASG. 2020. An mRNA Vaccine against  
434 SARS-CoV-2 - Preliminary Report. *N Engl J Med* doi:10.1056/NEJMoa2022483.
- 435 30. Erasmus JH, Khandhar AP, O'Connor MA, Walls AC, Hemann EA, Murapa P, Archer J,  
436 Leventhal S, Fuller JT, Lewis TB, Draves KE, Randall S, Guerriero KA, Duthie MS, Carter D,  
437 Reed SG, Hawman DW, Feldmann H, Gale M, Jr., Vesler D, Berglund P, Heydenburg Fuller D.  
438 2020. An alphavirus-derived replicon RNA vaccine induces SARS-CoV-2 neutralizing antibody  
439 and T cell responses in mice and nonhuman primates. *Sci Transl Med*  
440 doi:10.1126/scitranslmed.abc9396.
- 441 31. Folegatti PM, Ewer KJ, Aley PK, Angus B, Becker S, Belij-Rammerstorfer S, Bellamy D, Bibi S,  
442 Bittaye M, Clutterbuck EA, Dold C, Faust SN, Finn A, Flaxman AL, Hallis B, Heath P, Jenkin D,  
443 Lazarus R, Makinson R, Minassian AM, Pollock KM, Ramasamy M, Robinson H, Snape M,  
444 Tarrant R, Voysey M, Green C, Douglas AD, Hill AVS, Lambe T, Gilbert SC, Pollard AJ, Oxford  
445 CVTG. 2020. Safety and immunogenicity of the ChAdOx1 nCoV-19 vaccine against SARS-CoV-  
446 2: a preliminary report of a phase 1/2, single-blind, randomised controlled trial. *Lancet*  
447 doi:10.1016/S0140-6736(20)31604-4.
- 448 32. Deng W, Bao L, Liu J, Xiao C, Liu J, Xue J, Lv Q, Qi F, Gao H, Yu P, Xu Y, Qu Y, Li F, Xiang Z, Yu  
449 H, Gong S, Liu M, Wang G, Wang S, Song Z, Liu Y, Zhao W, Han Y, Zhao L, Liu X, Wei Q, Qin C.  
450 2020. Primary exposure to SARS-CoV-2 protects against reinfection in rhesus macaques.  
451 *Science* doi:10.1126/science.abc5343.
- 452 33. Smith TRF, Patel A, Ramos S, Elwood D, Zhu X, Yan J, Gary EN, Walker SN, Schultheis K,  
453 Purwar M, Xu Z, Walters J, Bhojnagarwala P, Yang M, Chokkalingam N, Pezzoli P, Parzych E,  
454 Reuschel EL, Doan A, Tursi N, Vasquez M, Choi J, Tello-Ruiz E, Maricic I, Bah MA, Wu Y,  
455 Amante D, Park DH, Dia Y, Ali AR, Zaidi FI, Generotti A, Kim KY, Herring TA, Reeder S,  
456 Andrade VM, Buttigieg K, Zhao G, Wu JM, Li D, Bao L, Liu J, Deng W, Qin C, Brown AS,  
457 Khoshnejad M, Wang N, Chu J, Wrapp D, McLellan JS, et al. 2020. Immunogenicity of a DNA  
458 vaccine candidate for COVID-19. *Nat Commun* 11:2601.
- 459 34. Ren W, Sun H, Gao GF, Chen J, Sun S, Zhao R, Gao G, Hu Y, Zhao G, Chen Y, Jin X, Fang F,  
460 Chen J, Wang Q, Gong S, Gao W, Sun Y, Su J, He A, Cheng X, Li M, Xia C, Li M, Sun L. 2020.  
461 Recombinant SARS-CoV-2 spike S1-Fc fusion protein induced high levels of neutralizing  
462 responses in nonhuman primates. *Vaccine* 38:5653-5658.
- 463 35. Wang H, Zhang Y, Huang B, Deng W, Quan Y, Wang W, Xu W, Zhao Y, Li N, Zhang J, Liang H,  
464 Bao L, Xu Y, Ding L, Zhou W, Gao H, Liu J, Niu P, Zhao L, Zhen W, Fu H, Yu S, Zhang Z, Xu G, Li  
465 C, Lou Z, Xu M, Qin C, Wu G, Gao GF, Tan W, Yang X. 2020. Development of an Inactivated  
466 Vaccine Candidate, BBIBP-CorV, with Potent Protection against SARS-CoV-2. *Cell* 182:713-  
467 721 e9.
- 468 36. Gao Q, Bao L, Mao H, Wang L, Xu K, Yang M, Li Y, Zhu L, Wang N, Lv Z, Gao H, Ge X, Kan B, Hu  
469 Y, Liu J, Cai F, Jiang D, Yin Y, Qin C, Li J, Gong X, Lou X, Shi W, Wu D, Zhang H, Zhu L, Deng W,  
470 Li Y, Lu J, Li C, Wang X, Yin W, Zhang Y, Qin C. 2020. Development of an inactivated vaccine  
471 candidate for SARS-CoV-2. *Science* 369:77-81.
- 472 37. Mulligan MJ, Lyke KE, Kitchin N, Absalon J, Gurtman A, Lockhart S, Neuzil K, Raabe V, Bailey  
473 R, Swanson KA, Li P, Koury K, Kalina W, Cooper D, Fontes-Garfias C, Shi PY, Tureci O,  
474 Tompkins KR, Walsh EE, Frenck R, Falsey AR, Dormitzer PR, Gruber WC, Sahin U, Jansen KU.

- 475 2020. Phase 1/2 study of COVID-19 RNA vaccine BNT162b1 in adults. *Nature*  
476 doi:10.1038/s41586-020-2639-4.
- 477 38. Zhu FC, Guan XH, Li YH, Huang JY, Jiang T, Hou LH, Li JX, Yang BF, Wang L, Wang WJ, Wu SP,  
478 Wang Z, Wu XH, Xu JJ, Zhang Z, Jia SY, Wang BS, Hu Y, Liu JJ, Zhang J, Qian XA, Li Q, Pan HX,  
479 Jiang HD, Deng P, Gou JB, Wang XW, Wang XH, Chen W. 2020. Immunogenicity and safety of  
480 a recombinant adenovirus type-5-vectored COVID-19 vaccine in healthy adults aged 18 years  
481 or older: a randomised, double-blind, placebo-controlled, phase 2 trial. *Lancet* 396:479-488.
- 482 39. Patel A, Walters J, Reuschel EL, Schultheis K, Parzych E, Gary EN, Maricic I, Purwar M, Eblimit  
483 Z, Walker SN, Guimet D, Bhojnagarwala P, Doan A, Xu Z, Elwood D, Reeder SM, Pessaint L,  
484 Kim KY, Cook A, Chokkalingam N, Finneyfrock B, Tello-Ruiz E, Dodson A, Choi J, Generotti A,  
485 Harrison J, Tursi NJ, Andrade VM, Dia Y, Zaidi FI, Andersen H, Lewis MG, Muthumani K, Kim  
486 JJ, Kulp DW, Humeau LM, Ramos S, Smith TRF, Weiner DB, Broderick KE. 2020. Intradermal-  
487 delivered DNA vaccine provides anamnestic protection in a rhesus macaque SARS-CoV-2  
488 challenge model. *bioRxiv* doi:10.1101/2020.07.28.225649:2020.07.28.225649.
- 489 40. Giroglou T, Cinatl J, Jr., Rabenau H, Drosten C, Schwalbe H, Doerr HW, von Laer D. 2004.  
490 Retroviral vectors pseudotyped with severe acute respiratory syndrome coronavirus S  
491 protein. *J Virol* 78:9007-15.
- 492 41. Ujike M, Huang C, Shirato K, Makino S, Taguchi F. 2016. The contribution of the cytoplasmic  
493 retrieval signal of severe acute respiratory syndrome coronavirus to intracellular  
494 accumulation of S proteins and incorporation of S protein into virus-like particles. *J Gen Virol*  
495 97:1853-1864.
- 496 42. Lontok E, Corse E, Machamer CE. 2004. Intracellular targeting signals contribute to  
497 localization of coronavirus spike proteins near the virus assembly site. *J Virol* 78:5913-22.
- 498 43. Sadasivan J, Singh M, Sarma JD. 2017. Cytoplasmic tail of coronavirus spike protein has  
499 intracellular targeting signals. *J Biosci* 42:231-244.
- 500 44. Petit CM, Melancon JM, Chouljenko VN, Colgrove R, Farzan M, Knipe DM, Kousoulas KG.  
501 2005. Genetic analysis of the SARS-coronavirus spike glycoprotein functional domains  
502 involved in cell-surface expression and cell-to-cell fusion. *Virology* 341:215-30.
- 503 45. Howard MW, Travanty EA, Jeffers SA, Smith MK, Wennier ST, Thackray LB, Holmes KV. 2008.  
504 Aromatic amino acids in the juxtamembrane domain of severe acute respiratory syndrome  
505 coronavirus spike glycoprotein are important for receptor-dependent virus entry and cell-  
506 cell fusion. *J Virol* 82:2883-94.
- 507 46. Fukushi S, Mizutani T, Saijo M, Matsuyama S, Miyajima N, Taguchi F, Itamura S, Kurane I,  
508 Morikawa S. 2005. Vesicular stomatitis virus pseudotyped with severe acute respiratory  
509 syndrome coronavirus spike protein. *J Gen Virol* 86:2269-2274.
- 510 47. Ghani K, Wang X, de Campos-Lima PO, Olszewska M, Kamen A, Riviere I, Caruso M. 2009.  
511 Efficient human hematopoietic cell transduction using RD114- and GALV-pseudotyped  
512 retroviral vectors produced in suspension and serum-free media. *Hum Gene Ther* 20:966-74.
- 513 48. Cantin R, Diou J, Belanger D, Tremblay AM, Gilbert C. 2008. Discrimination between  
514 exosomes and HIV-1: purification of both vesicles from cell-free supernatants. *J Immunol*  
515 Methods 338:21-30.
- 516 49. Dettenhofer M, Yu XF. 1999. Highly purified human immunodeficiency virus type 1 reveals a  
517 virtual absence of Vif in virions. *J Virol* 73:1460-7.



- 518 50. Morris KV. 2020. The Improbability of the Rapid Development of a Vaccine for SARS-CoV-2.  
519 Mol Ther 28:1548-1549.
- 520 51. Yu J, Tostanoski LH, Peter L, Mercado NB, McMahan K, Mahrokhian SH, Nkolola JP, Liu J, Li Z,  
521 Chandrashekar A, Martinez DR, Loos C, Atyeo C, Fischinger S, Burke JS, Slein MD, Chen Y,  
522 Zuiani A, Lelis FJN, Travers M, Habibi S, Pessaint L, Van Ry A, Blade K, Brown R, Cook A,  
523 Finneyfrock B, Dodson A, Teow E, Velasco J, Zahn R, Wegmann F, Bondzie EA, Dagotto G,  
524 Gebre MS, He X, Jacob-Dolan C, Kirilova M, Kordana N, Lin Z, Maxfield LF, Nampanya F,  
525 Nityanandam R, Ventura JD, Wan H, Cai Y, Chen B, Schmidt AG, Wesemann DR, Baric RS, et  
526 al. 2020. DNA vaccine protection against SARS-CoV-2 in rhesus macaques. Science  
527 doi:10.1126/science.abc6284.
- 528 52. Mercado NB, Zahn R, Wegmann F, Loos C, Chandrashekar A, Yu J, Liu J, Peter L, McMahan K,  
529 Tostanoski LH, He X, Martinez DR, Rutten L, Bos R, van Manen D, Vellinga J, Custers J,  
530 Langedijk JP, Kwaks T, Bakkens MJG, Zuijdgeest D, Huber SKR, Atyeo C, Fischinger S, Burke JS,  
531 Feldman J, Hauser BM, Caradonna TM, Bondzie EA, Dagotto G, Gebre MS, Hoffman E, Jacob-  
532 Dolan C, Kirilova M, Li Z, Lin Z, Mahrokhian SH, Maxfield LF, Nampanya F, Nityanandam R,  
533 Nkolola JP, Patel S, Ventura JD, Verrington K, Wan H, Pessaint L, Ry AV, Blade K, Strasbaugh  
534 A, Cabus M, et al. 2020. Single-shot Ad26 vaccine protects against SARS-CoV-2 in rhesus  
535 macaques. Nature doi:10.1038/s41586-020-2607-z.
- 536 53. Kobinger GP, Limberis MP, Somanathan S, Schumer G, Bell P, Wilson JM. 2007. Human  
537 immunodeficiency viral vector pseudotyped with the spike envelope of severe acute  
538 respiratory syndrome coronavirus transduces human airway epithelial cells and dendritic  
539 cells. Hum Gene Ther 18:413-22.
- 540 54. Moore MJ, Dorfman T, Li W, Wong SK, Li Y, Kuhn JH, Coderre J, Vasileva N, Han Z,  
541 Greenough TC, Farzan M, Choe H. 2004. Retroviruses pseudotyped with the severe acute  
542 respiratory syndrome coronavirus spike protein efficiently infect cells expressing  
543 angiotensin-converting enzyme 2. J Virol 78:10628-35.
- 544 55. Schmidt F, Weisblum Y, Muecksch F, Hoffmann HH, Michailidis E, Lorenzi JCC, Mendoza P,  
545 Rutkowska M, Bednarski E, Gaebler C, Agudelo M, Cho A, Wang Z, Gazumyan A, Cipolla M,  
546 Caskey M, Robbiani DF, Nussenzweig MC, Rice CM, Hatziioannou T, Bieniasz PD. 2020.  
547 Measuring SARS-CoV-2 neutralizing antibody activity using pseudotyped and chimeric  
548 viruses. J Exp Med 217.
- 549 56. Crawford KHD, Eguia R, Dingens AS, Loes AN, Malone KD, Wolf CR, Chu HY, Tortorici MA,  
550 Veessler D, Murphy M, Pettie D, King NP, Balazs AB, Bloom JD. 2020. Protocol and Reagents  
551 for Pseudotyping Lentiviral Particles with SARS-CoV-2 Spike Protein for Neutralization  
552 Assays. Viruses 12.
- 553 57. Johnson MC, Lyddon TD, Suarez R, Salcedo B, LePique M, Graham M, Ricana C, Robinson C,  
554 Ritter DG. 2020. Optimized pseudotyping conditions for the SARS COV-2 Spike glycoprotein. J  
555 Virol doi:10.1128/JVI.01062-20.
- 556 58. Nolte-'t Hoen E, Cremer T, Gallo RC, Margolis LB. 2016. Extracellular vesicles and viruses: Are  
557 they close relatives? Proc Natl Acad Sci U S A 113:9155-61.
- 558 59. Gould SJ, Booth AM, Hildreth JE. 2003. The Trojan exosome hypothesis. Proc Natl Acad Sci U  
559 S A 100:10592-7.
- 560 60. Kuate S, Cinatl J, Doerr HW, Uberla K. 2007. Exosomal vaccines containing the S protein of  
561 the SARS coronavirus induce high levels of neutralizing antibodies. Virology 362:26-37.

- 562 61. Wang X, Olszewska M, Qu J, Wasielewska T, Bartido S, Hermetet G, Sadelain M, Riviere I.  
563 2015. Large-scale clinical-grade retroviral vector production in a fixed-bed bioreactor. *J*  
564 *Immunother* 38:127-35.
- 565 62. Zhang L, Jackson CB, Mou H, Ojha A, Rangarajan ES, Izard T, Farzan M, Choe H. 2020. The  
566 D614G mutation in the SARS-CoV-2 spike protein reduces S1 shedding and increases  
567 infectivity. bioRxiv doi:10.1101/2020.06.12.148726.
- 568 63. Kirchmeier M, Fluckiger AC, Soare C, Bozic J, Ontsouka B, Ahmed T, Diress A, Pereira L,  
569 Schodel F, Plotkin S, Dalba C, Klatzmann D, Anderson DE. 2014. Enveloped virus-like particle  
570 expression of human cytomegalovirus glycoprotein B antigen induces antibodies with potent  
571 and broad neutralizing activity. *Clin Vaccine Immunol* 21:174-80.
- 572 64. Garrone P, Fluckiger AC, Mangeot PE, Gauthier E, Dupeyrot-Lacas P, Mancip J, Cangialosi A,  
573 Du Chene I, LeGrand R, Mangeot I, Lavillette D, Bellier B, Cosset FL, Tangy F, Klatzmann D,  
574 Dalba C. 2011. A prime-boost strategy using virus-like particles pseudotyped for HCV  
575 proteins triggers broadly neutralizing antibodies in macaques. *Sci Transl Med* 3:94ra71.
- 576 65. Ghani K, Cottin S, Kamen A, Caruso M. 2007. Generation of a high-titer packaging cell line for  
577 the production of retroviral vectors in suspension and serum-free media. *Gene Ther*  
578 14:1705-11.
- 579 66. Schindelin J, Arganda-Carreras I, Frise E, Kaynig V, Longair M, Pietzsch T, Preibisch S, Rueden  
580 C, Saalfeld S, Schmid B, Tinevez JY, White DJ, Hartenstein V, Eliceiri K, Tomancak P, Cardona  
581 A. 2012. Fiji: an open-source platform for biological-image analysis. *Nat Methods* 9:676-82.

582

583

584 **FIG 1** Expression of S protein at the surface of 293 cells. FACS analysis of cells transiently  
585 transfected with plasmids encoding the Galv envelope, the full-length S protein, and the  $\Delta$ S version.  
586 S was detected with an anti-S1 antibody.

587 **FIG 2** Expression of ACE2 at the surface of 293-ACE2 cells measured by FACS analysis.

588 **FIG 3** Transduction efficiency of different GFP pseudotyped vectors produced in transient  
589 transfections. Two days after infection of 293-ACE2 cells, titers of VSV-G-, Galv-, S- and  $\Delta$ S-  
590 pseudotyped vectors were (A) measured by FACS analysis or (B) evaluated by fluorescence  
591 microscopy. Values presented are the mean  $\pm$  SD of three independent experiments. Fluorescent and  
592 bright-field pictures are displayed. The envelope pseudotype and the volume used for infection are  
593 indicated.

594 **FIG 4** Characterization of stable VLPs producer cells. (A) S expression was measured by FACS  
595 analysis of 293GP, 293GP-S and 293GP- $\Delta$ S cells with an anti-S1 antibody. (B) GFP fluorescence of  
596 293GP-Galv/GFP, 293GP-S/GFP and 293GP- $\Delta$ S/GFP measured by FACS analysis.

597

598 **FIG 5** Transduction efficiency of GFP pseudotyped vectors released from stable producers. (A)  
599 Fluorescent and bright-field pictures are displayed. The envelope pseudotype and the volume used  
600 for infection are indicated. (B) Titers of Galv-, S- and  $\Delta$ S-pseudotyped vectors produced from stable  
601 producers were measured by FACS analysis two days after infection. Values presented are the mean  
602  $\pm$  SD of three independent experiments.

603



604 **FIG 6** Fusion mediated by S and  $\Delta$ S. 293, 293GP-S and 293GP- $\Delta$ S were mixed with 293-ACE2 cells  
605 at a 1/10 ratio. Syncytia (arrow) were observed 24 h later.

606

607 **FIG 7** Quantification of S and  $\Delta$ S incorporated into VLPs. (A) Western blot analysis from  
608 concentrated supernatants of 293GP and 293 cells using anti-S2 and anti-p30 antibodies. Different  
609 amounts of Fc-tagged S2 were also loaded on the gel to quantify S2 in VLPs. (B) Differences  
610 between S and  $\Delta$ S incorporation into VLPs. All the bands detected by the anti-S2 antibody in S- and  
611  $\Delta$ S-containing samples were quantified and normalized with the signal obtained for MLV p30.  
612 Values presented are the mean  $\pm$  SD of three independent experiments analyzed twice in Western  
613 blot. (C) Western blot analysis of SARS CoV-2 S protein in cellular extracts. Signals for S2, S, and  
614 multimeric forms of S were detected with the anti-S2 antibody. The Gag precursor pr65 was detected  
615 with the anti-p30 antibody.

616

617 **FIG 8** Incorporation of SARS-CoV-2  $\Delta$ S into MLV VLPs. Western blot analysis with antibodies  
618 against S2 and p30 on collected fractions separated with an iodixanol velocity gradient of (A) 293- $\Delta$ S  
619 and (B) 293GP- $\Delta$ S supernatants. The arrow below the blot indicates the density gradient.

620

621

622

623

Fig. 1

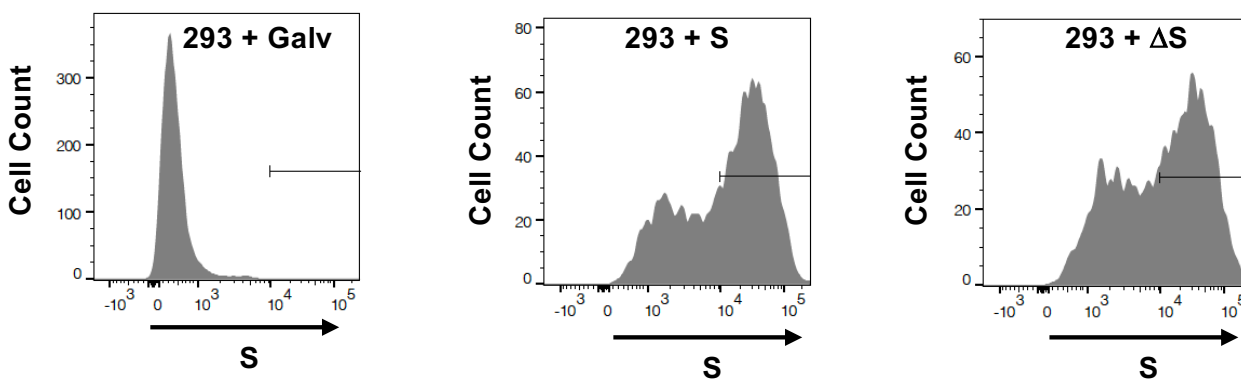

Fig. 2

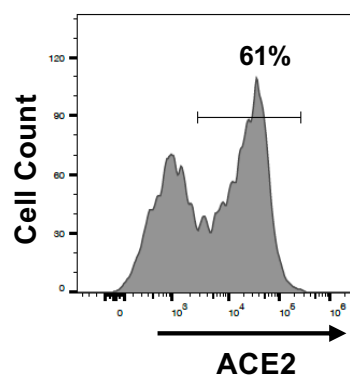

Fig. 3

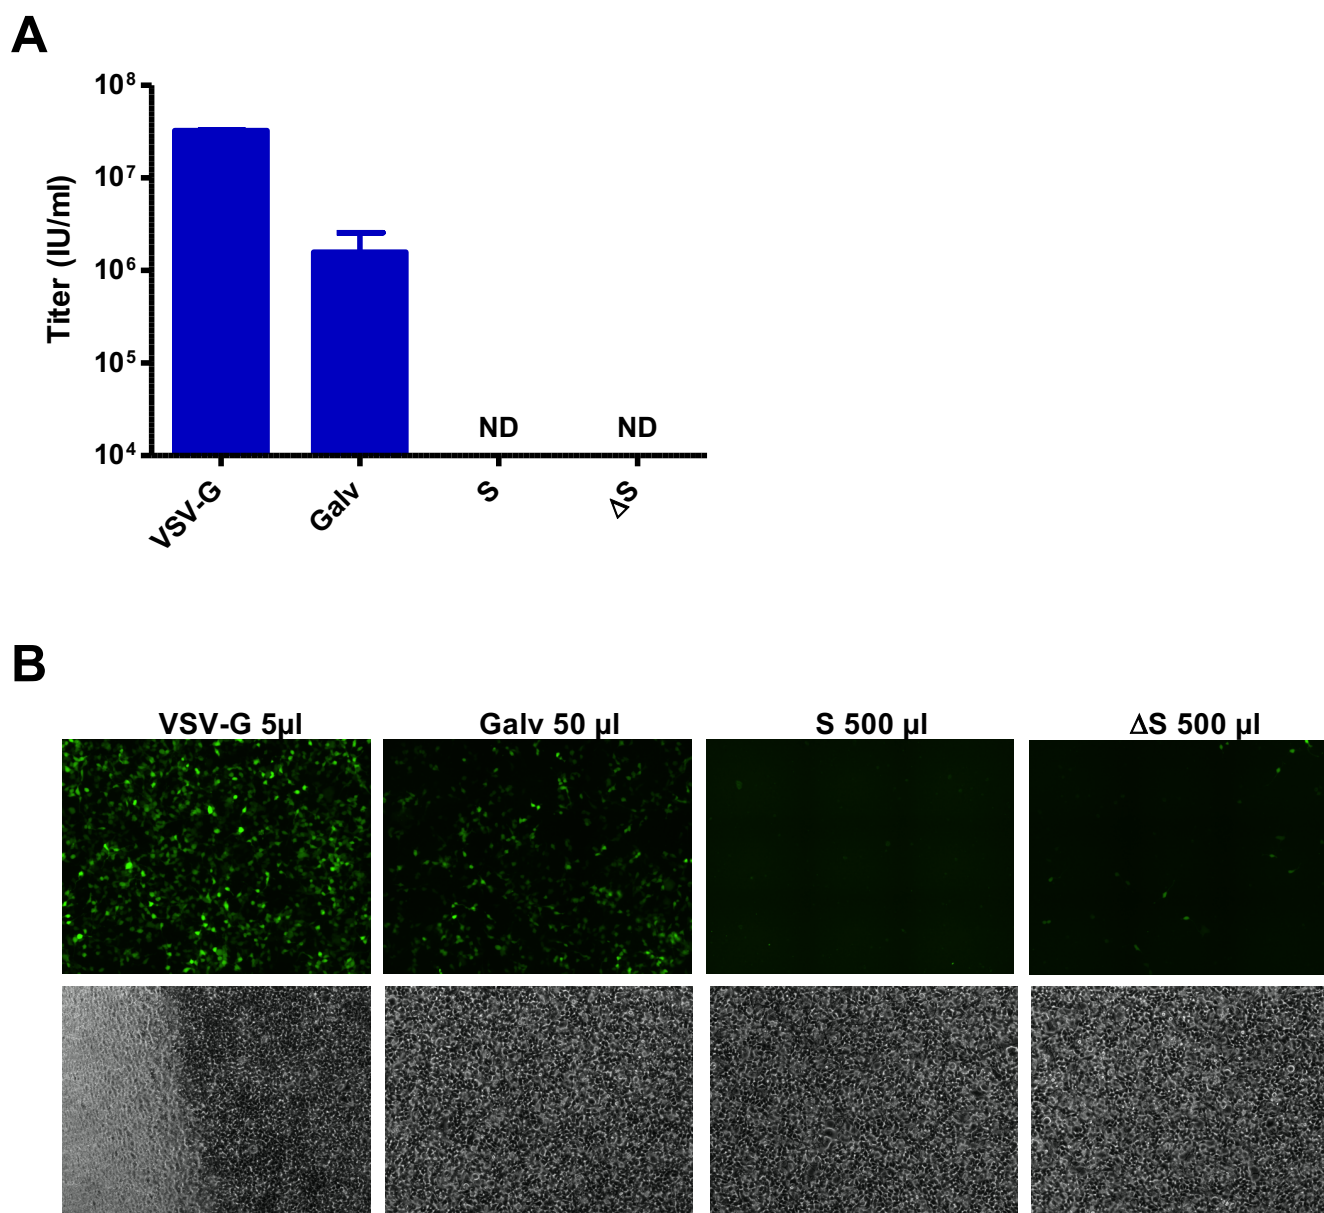

Fig. 4

**A**

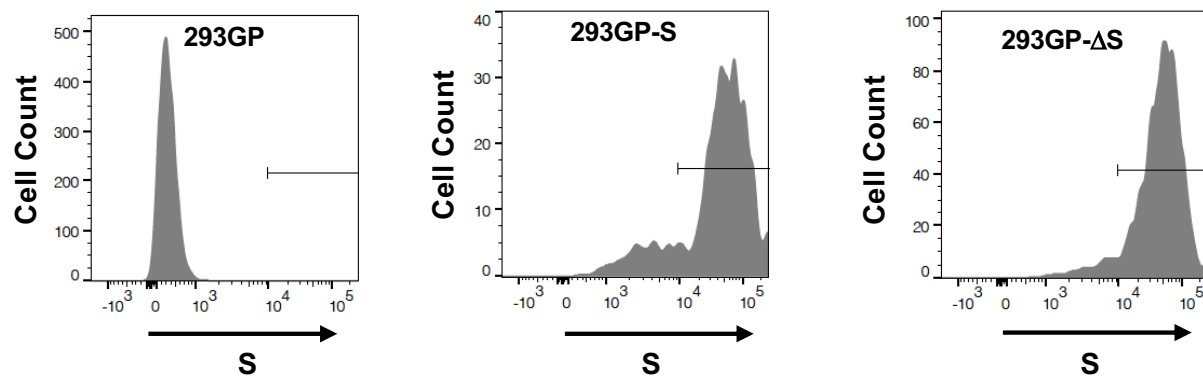

**B**

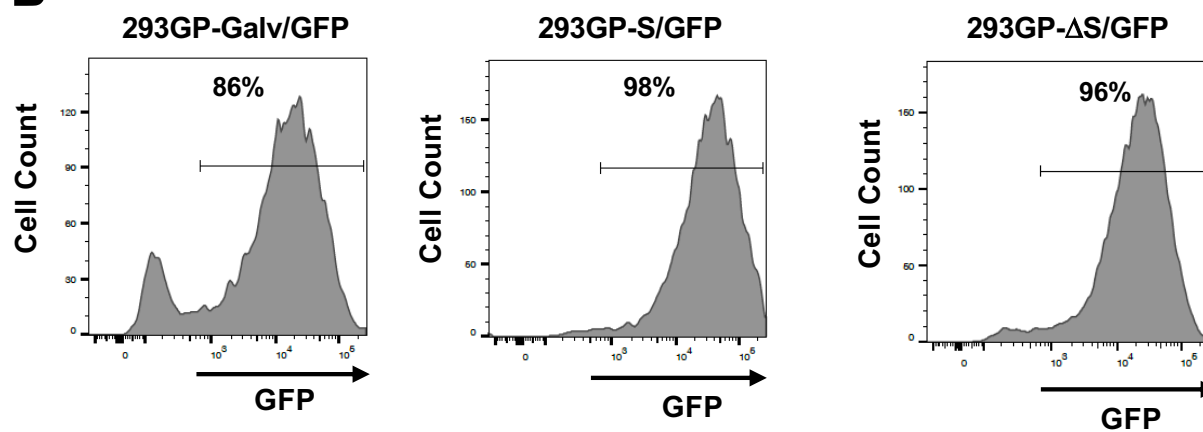

Fig. 5

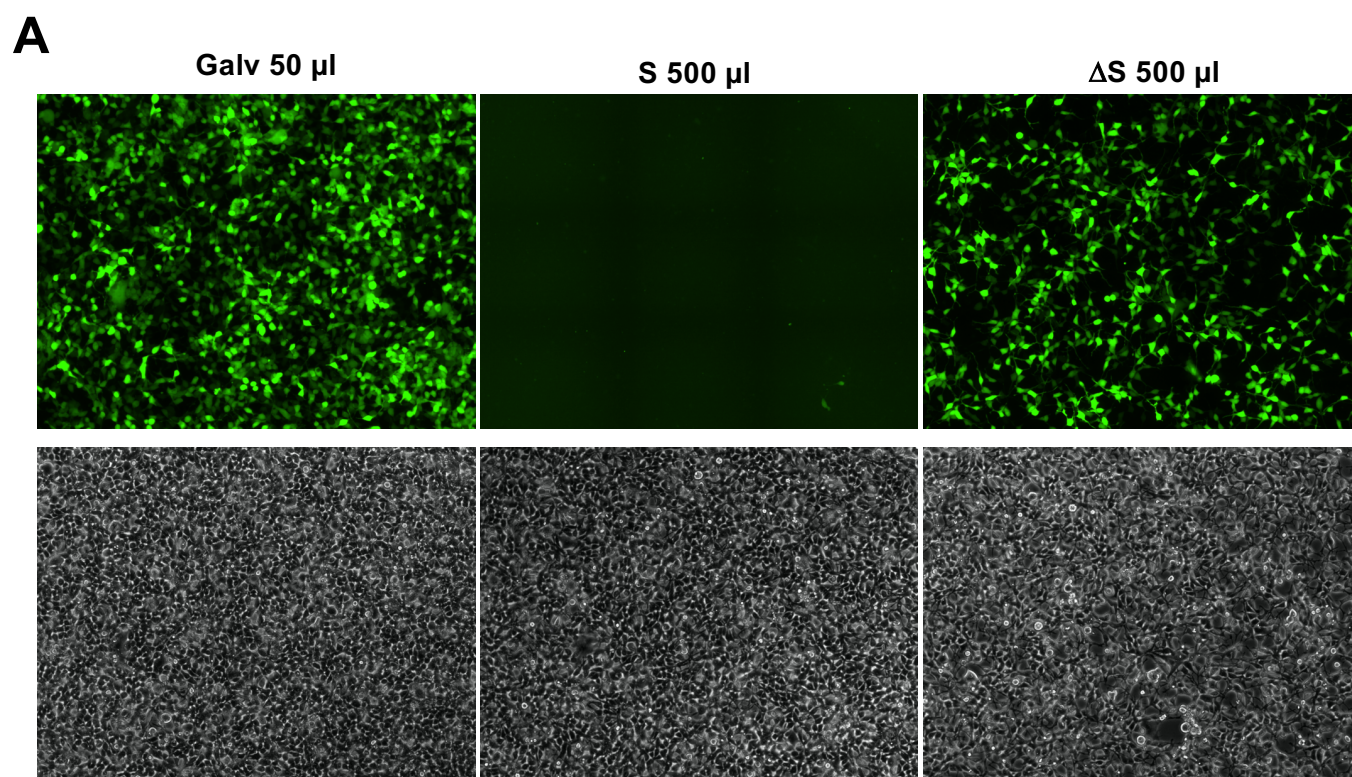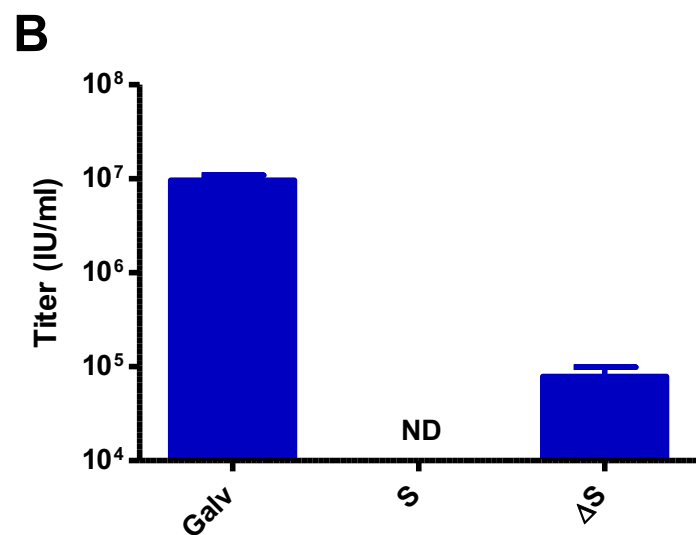

Fig. 6

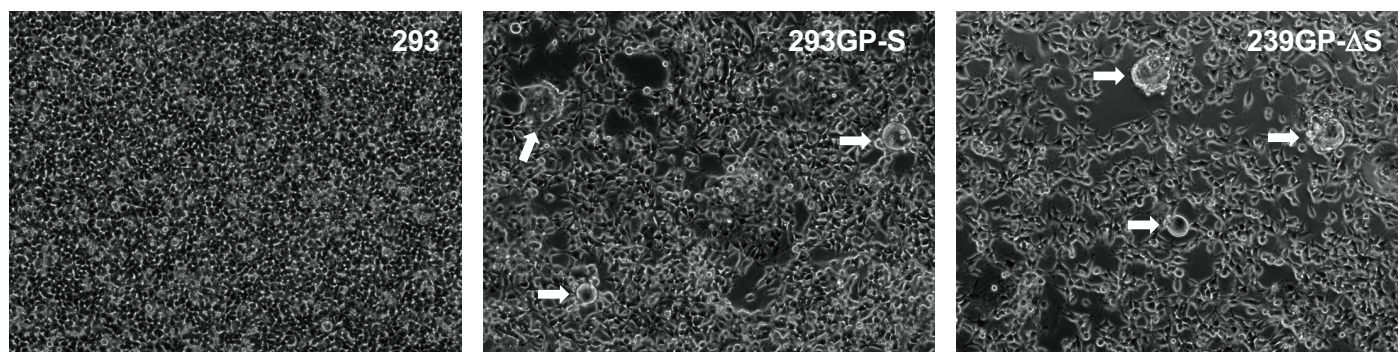



Fig. 7

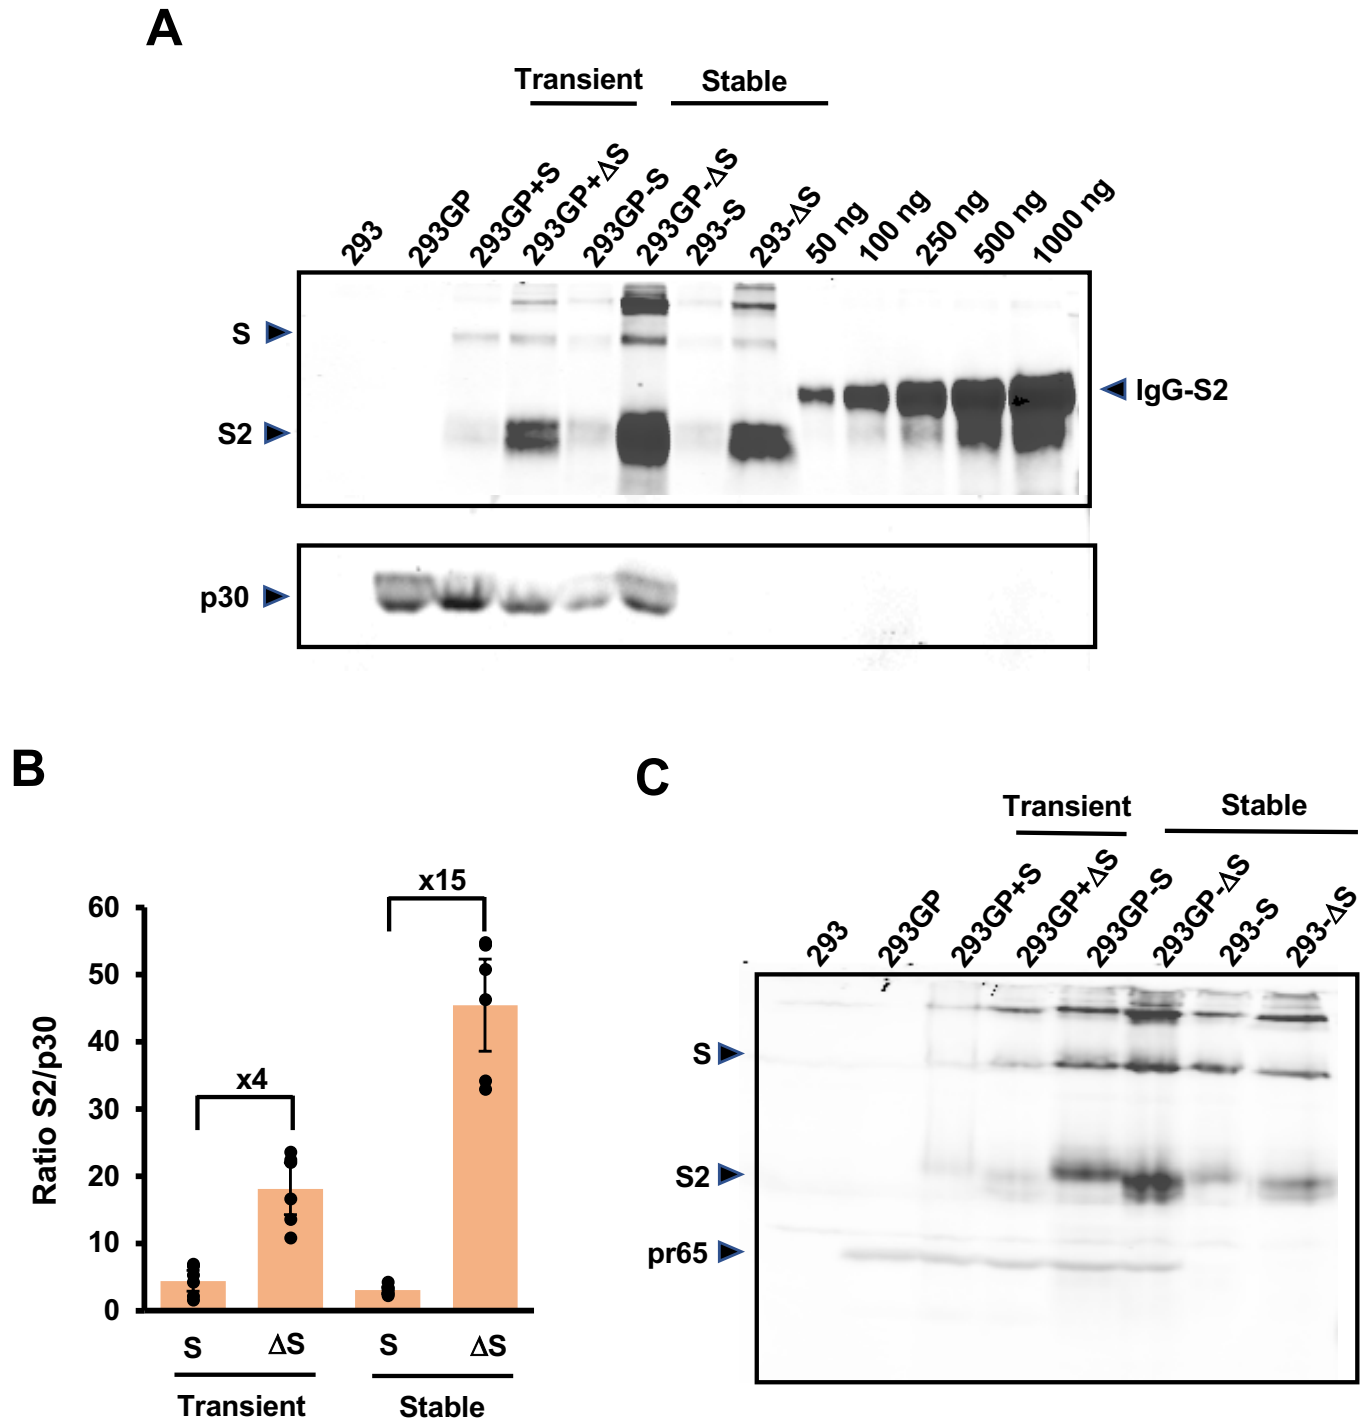



Fig. 8

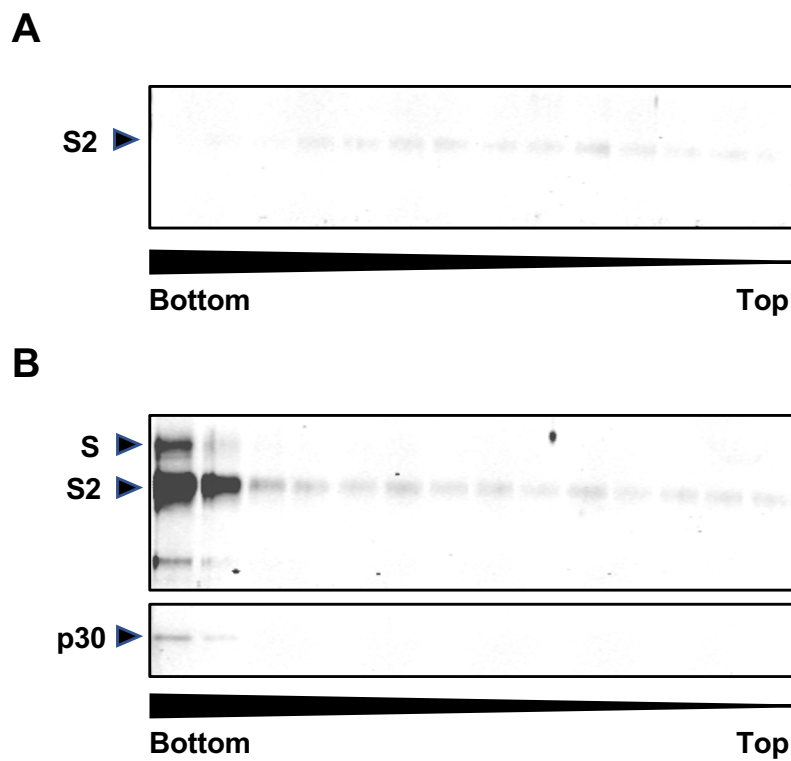

Source: https://www.biorxiv.org/content/10.1101/2020.09.16.298992v1.full.pdf
